# Supplementary material
Source: publisher site journal article supplement (https://www.dovepress.com/article/361072)
Supplement: Supplementary file 1 [file get_supplementary_file.php]

**Supplement 1 Cerebral blood flow of MCAO brain monitors at pre-operation, operation and post-operation**

(A) Cerebral blood flow is strictly monitored during the MCAO modeling using PeriFlux System 5000 (Perimed AB, Sweden), which is sharply dropped when line embolism blocks the middle cerebral artery. The cerebral blood flow is also measured by PeriCam PSI (Perimed AB, Sweden) at pre-operation (B) and post-operation (C).





**Supplement 2 Dauricine affects peripheral immunity cells infiltration into the MCAO-R brain and peripheral immunity in blood**

(A) Gating strategy for infiltrating immune cells isolated from the ischemic brain after tMCAO. Counts of CD4+ T cells (B), CD8+ T cells (C), B cells (D), macrophage (E), and monocyte (F) in the brains of the sham, control and dauricine groups of tMCAO mice. (G) Gating strategy for infiltrating immune cells isolated from the blood after tMCAO. Counts of CD4+ T cells (H), CD8+ T cells (I), B cells (J), macrophage (K), and monocyte (L) in the blood of the sham, control and dauricine groups of tMCAO mice. n = 3 per group. Sham group vs tMCAO group, *p < 0.05; MCAO group vs (MCAO + Dauricine) group, ##p < 0.01, ###p < 0.001; unpaired Student’s t test.


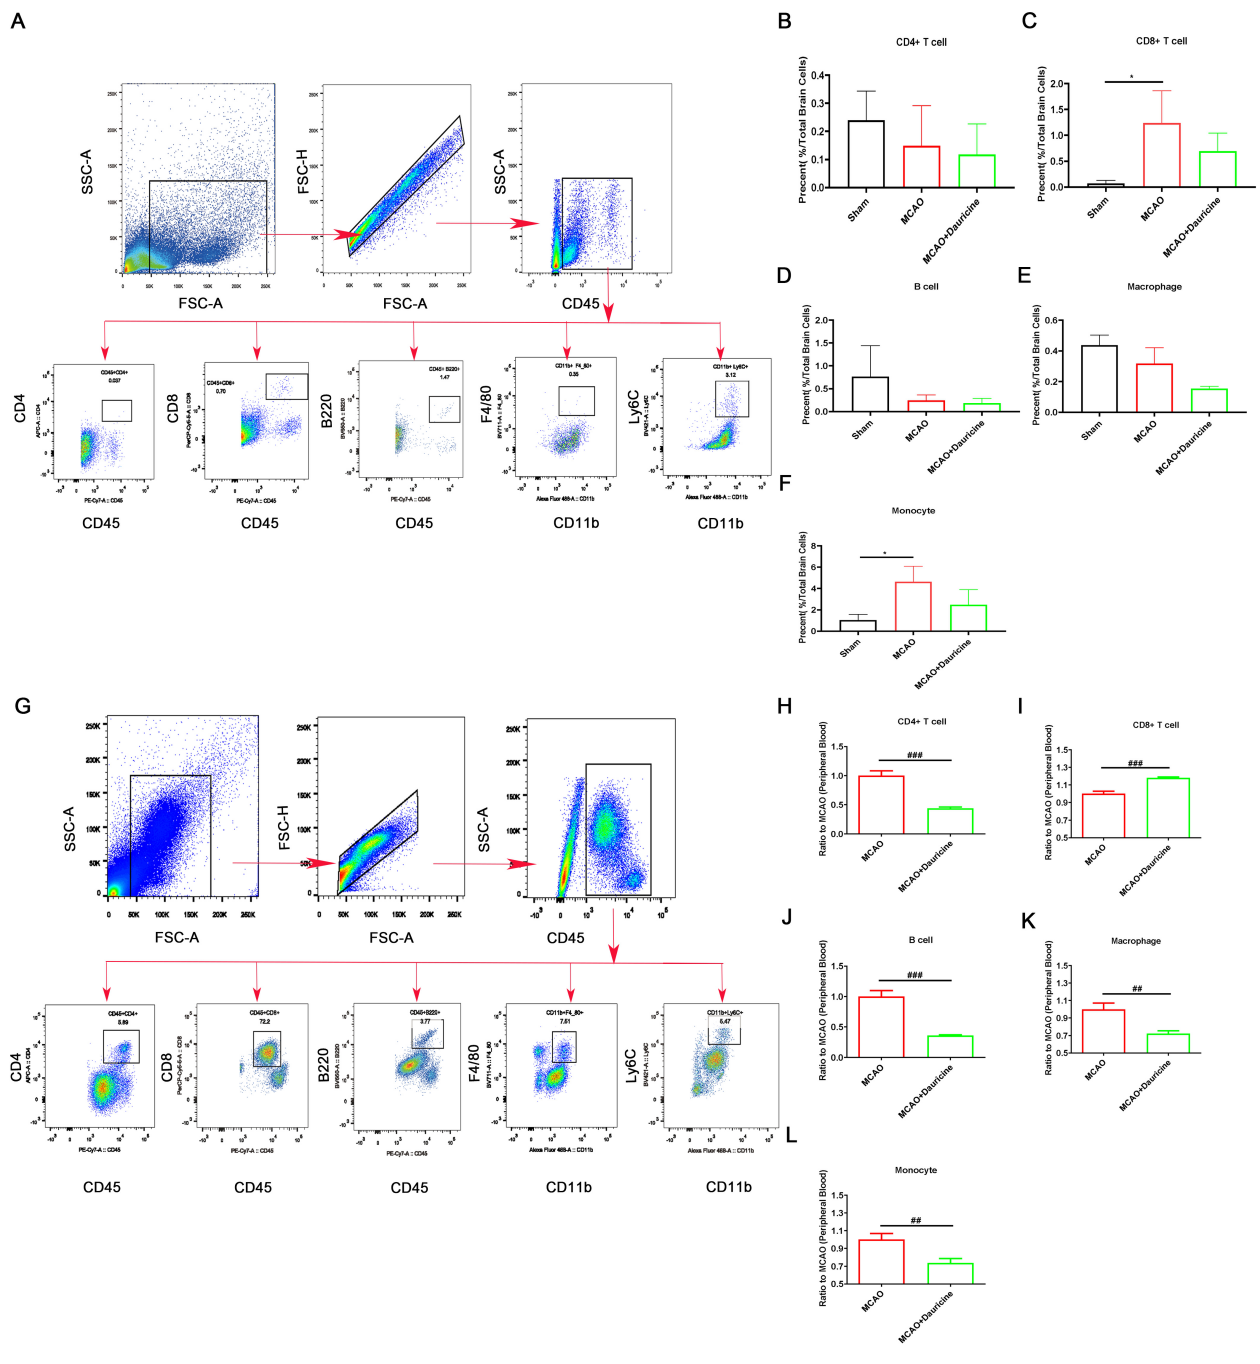


**Supplement 3 The effect of dauricine on BBB in vivo after MCAO**

(A) The representative picture of MCAO mouse injected with evans blue (EB) and anatomical drawing. (B) The brain and brain slices stained with evans blue (EB). (C) The statistical results of EB concentration in the supernatant at 620 nm. n = 3 per group. Sham group vs MCAO group, ***p < 0.001, unpaired Student’s t test.
